# Supplementary material for: Dynamic Recrystallization Constitutive Model and Texture Evolution of Metastable β Titanium Alloy TB8 during Thermal Deformation
Source: MDPI journal article supplement (doi:10.3390/ma17071572), 2024-03-29
Supplement: s1 [file s1]

## Attachment

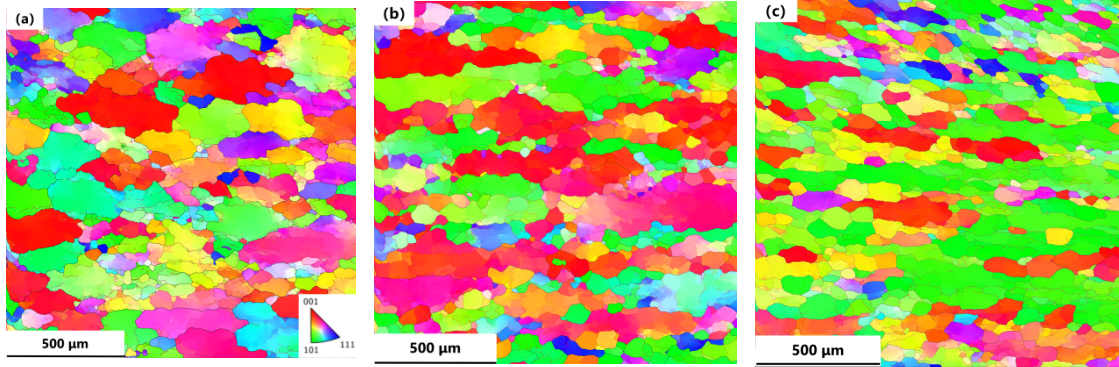

Figure S1 Inverse pole figure of TB8 titanium alloy under different deformation: (a)30%; (b)50%; (c)70%

### Dynamic recrystallization constitutive model

In the process of thermal deformation, the flow stress  $\sigma$  can be expressed as a function of strain rate, strain  $\varepsilon$ , and deformation temperature  $T$ :

$$\sigma = f(\dot{\varepsilon})f(\varepsilon)f(T) \quad (1)$$

Sellars believes that the relationship between flow stress  $\sigma$  and strain rate, strain  $\varepsilon$  and deformation temperature  $T$  can be expressed by hyperbolic sine function under high temperature thermal deformation.

$$\dot{\varepsilon} = A \left[ \sinh(\alpha \sigma_p) \right]^n \exp(-Q_a / RT) \quad (2)$$

According to Galiyev, the relationship between flow stress  $\sigma$  and strain rate, strain  $\varepsilon$  and deformation temperature  $T$  at low strain rate can be expressed as:

$$\dot{\varepsilon} = A \sigma_p^n \exp(-Q_a / RT) \quad (3)$$

Mwembela believes that the relationship between flow stress  $\sigma$  and strain rate, strain  $\varepsilon$  and deformation temperature  $T$  at high strain rate can be expressed as:

$$\dot{\varepsilon} = A \exp(\beta \sigma_p) \exp(-Q_a / RT) \quad (4)$$

$\sigma_p$  is the peak stress,  $Q_a$  is the deformation activation energy (J/mol)  $R=8.134\text{J}/(\text{mol}\cdot\text{K})$ ,  $T$  is the mechanical temperature (K),  $\alpha$ ,  $\beta$ ,  $n$ ,  $A$  are the parameters of the material itself. Logarithms were taken on both sides of the above formula, and the results obtained by linear regression were shown in Table 1

Table S1 linear regression analysis values of  $n_1$ ,  $\beta$  and  $n$

|     | $n_1$    | $\beta$ | $n$     |
|-----|----------|---------|---------|
| 780 | 4.375044 | 0.03089 | 2.41164 |
| 840 | 3.71953  | 0.03626 | 2.4988  |
| 900 | 3.51992  | 0.05097 | 2.84737 |
| 960 | 3.97281  | 0.07058 | 3.43154 |

|         |          |          |          |
|---------|----------|----------|----------|
| average | 3.896826 | 0.047175 | 2.797338 |
|---------|----------|----------|----------|

For Eq. (2), when the deformation rate is constant,  $Q_a/Rn$  can be obtained by linear regression, and  $Q_a/Rn$  at multiple strain rates can be obtained by changing the strain rate. The average value of  $Q_a/Rn$  can be obtained by adding  $R$  and  $n$  into  $Q_a/Rn$ , as shown in Table 2, and  $Q_A = 239147\text{J/mol}$ .

Table S2  $Q_a/Rn$  linear regression analysis values

| strain rate | 0.1         | 0.01       | 0.001      | average     |
|-------------|-------------|------------|------------|-------------|
| $Q_a/Rn$    | 12695.71405 | 8684.08382 | 9468.51911 | 10282.77233 |

Zener and Hollomon proposed that in addition to the material itself, the stress-strain relationship is mainly affected by the deformation temperature  $T$  and strain rate, which can be expressed by the Zener-Hollomon parameter:

$$Z = \dot{\epsilon} \exp(Q_a / RT) \quad (5)$$

The relationship between the peak strain  $\epsilon_p$  and the  $Z$  parameter can be expressed as follows:

$$\epsilon_p = K_p Z^{-P} \quad (6)$$

Where  $\epsilon_p$  can be obtained from the stress-strain curve, the biased linear fit to  $\epsilon_p$  and  $Z$  can be obtained as follows:  $K_p=1.730813$ ,  $P=0.14929$ .

The relationship between the critical strain  $\epsilon_c$  and the peak strain  $\epsilon_p$  can be expressed as follows:

$$\epsilon_c = \lambda \epsilon_p \quad (7)$$

Where  $\lambda$  is a parameter of the material itself, most alloys are in the range of 0.67-0.89, for TB8 titanium alloy take 0.83 for calculation.

In this paper, we use the equation proposed by Laasraoui et al. based on the relationship between DRX and stress softening to obtain  $X_{drx}[1]$ :

$$X_{drx} = \frac{\sigma_s - \sigma}{\sigma_s - \sigma_{ss}} \quad (8)$$

The saturated strain  $\sigma_s$  and steady state strain  $\sigma_{ss}$  can be expressed in terms of hyperbolic sine functions applicable to all stress cases. The  $\sigma_s$  and  $\sigma_{ss}$  in terms of the  $Z$ -parameter can be expressed as:

$$\begin{cases} \sigma_s = 86.6446 \times \sinh^{-1}(n_s Z^{d_s}) \\ \sigma_{ss} = 86.6446 \times \sinh^{-1}(1.26 \times 10^{-3} Z^{0.30876}) \end{cases} \quad (9)$$

where  $n_s$  and  $d_s$  are parameters of the material itself, which can be obtained by quadratic fitting to the strain rate:

$$\begin{cases} d_s = 0.01376 \times \ln \dot{\varepsilon}^2 + 0.14417 \ln \dot{\varepsilon} + 0.60966 \\ n_s = -0.14396 \times 10^{-4} \times \ln \dot{\varepsilon}^2 - 0.00806 \ln \dot{\varepsilon} - 0.136 \end{cases} \quad (10)$$

According to JMAK kinetic theory[2], the kinetic model of dynamic recrystallization is expressed as follows:

$$X_{drx} = 1 - \exp \left[ -K_d \left( \frac{\varepsilon - \varepsilon_c}{\varepsilon_p} \right)^{p_d} \right] \quad (11)$$

Where  $d_1$ ,  $m_d$  are parameters of the material itself. Derivation of the above equation gives:

$$\ln[-\ln(1 - X_{drx})] = \ln d_1 + m_d \ln \left( \frac{\varepsilon - \varepsilon_c}{\varepsilon_p} \right) \quad (12)$$

A linear regression analysis of the above equation yields  $K_d$ ,  $P_d$  for different deformation conditions, and a biased linear fit to the Z parameter:

$$K_d = 66.34577 Z^{-0.19488} \quad (13)$$

$$P_d = 3 \times 10^{-4} Z^{-0.31595} \quad (14)$$

From the stress-strain diagram, it can be seen that the elastic phase of TB8 titanium alloy conforms to the shear Hooke's law can be expressed as:

The relationship between theyield stress and the Z parameter can be expressed as follows:

$$\sigma_0 = k_0 \cdot Z^{d_0} \quad (15)$$

Where  $\sigma_0$  can be obtained from the stress-strain curve, the biased linear fit to  $\varepsilon_p$  and Z can be obtained as follows:  $k_0=0.33511$ ,  $d_0=0.26082$ .

Based on the dislocation density theory, the evolution of dislocation density  $\rho$  with  $\varepsilon$  during the initial stage of thermal deformation, i.e., the hardening stage, can be expressed as[3]:

$$\frac{d\rho}{d\varepsilon} = U - \Omega\rho \quad (16)$$

Where  $\rho$  represents the dislocation density, U denotes the work-hardening coefficient, and  $\Omega$  signifies the dynamic softening coefficient. The stress needed for the material to undergo high-temperature plastic deformation is principally determined by the proliferation of dislocations and inter-dislocation resistance. The relationship between flow stress and dislocation density can be expressed by the Taylor relationship as[3]:

$$\sigma = \alpha \mu b \sqrt{\rho} \quad (17)$$

where  $\alpha$  represents the parameter of the material,  $\mu$  is the shear modulus, and b is the Burgers vector. This can be obtained by bringing Eq. (15) into Eq. (14) and integrating:

$$\sigma_w = \left[ \sigma_s^2 + (\sigma_0^2 - \sigma_s^2) e^{-\omega \varepsilon} \right]^{0.5} \dots \dots (\varepsilon_q < \varepsilon \leq \varepsilon_c) \quad (18)$$

Where  $\sigma_0$  represents the yield stress and  $\omega$  denotes the dynamic softening amount. The experimentally obtained stress and strain values on the flow stress curve prior to reaching the critical strain can be chosen. These values can be substituted into the equation above to determine the value of  $\omega$  under varying strain conditions. This can be obtained by plotting the  $\ln\omega$ - $\ln Z$  relationship and fitting it to a line row:

$$\omega = 0.282995 \cdot Z^{0.1341} \quad (19)$$

When the critical strain is reached, DRX starts to appear in TB8 titanium alloy, and the rheological stress model for the DRX stage can be obtained according to Eqs. (11) and (20):

$$\sigma_d = \sigma_w - (\sigma_s - \sigma_{ss}) X_{drx} \cdots \cdots (\varepsilon_c < \varepsilon) \quad (20)$$

The relationship between the dynamically recrystallized grain size  $D_{drx}$  and the Z parameter can be expressed by the following equation:

$$D_{drx} = CZ^h \quad (21)$$

Where C and h are intrinsic parameters of the material. By taking logarithms on both sides of the equation mentioned above, linear regression shows that  $h = -0.3601$  and  $C = 1.45 \times 10^4$ .

## References

1. El Wahabi M, Cabrera J M, Prado J M. Hot working of two AISI 304 steels: a comparative study. *Materials Science and Engineering a-Structural Materials Properties Microstructure and Processing*. **2003**, 343, 116-25.
2. Manohar P A, Lim K, Rollett A D, Lee Y. Computational exploration of microstructural evolution in a medium C-Mn steel and applications to rod mill. *Isij International*. **2003**, 43, 1421-30.
3. Lin Y C, Chen X M, Wen D X, Chen M S. A physically-based constitutive model for a typical nickel-based superalloy. *Computational Materials Science*. **2014**, 83, 282-9.
